# Supplementary material for: Phylogeny and herbivory are related to avian cecal size
Source: PubMed Central journal article supplement (PMC6414633; doi:10.1038/s41598-019-40822-0), 2019-03-12
Supplement: 41598_2019_40822_MOESM2_ESM.pdf [file 41598_2019_40822_MOESM2_ESM.pdf]

**TITLE: Phylogeny and herbivory are related to avian cecal size**

Andrew Hunt<sup>1</sup>, Layla Al-Nakkash<sup>2</sup>, Andrew H. Lee<sup>3†</sup>, Heather F. Smith<sup>3, 4†\*</sup>

<sup>1</sup>Department of Biomedical Sciences, Midwestern University, Glendale, AZ 85308.

<sup>2</sup>Department of Physiology, Midwestern University, Glendale, AZ 85308.

<sup>3</sup>Department of Anatomy, Midwestern University, Glendale, AZ 85308.

<sup>4</sup>School of Human Evolution and Social Change, Arizona State University, Tempe, AZ 85287.

\*To whom correspondence should be addressed: Dr. Heather F. Smith, Department of Anatomy, Arizona College of Osteopathic Medicine, Midwestern University, 19555 N. 59th Ave., Glendale, AZ 85308, USA.

E-mail: hsmith@midwestern.edu, Tel: 1-623-572-3726, Fax: 1-623-572-3679.

†These authors contributed equally to this work.

**Supplementary Information**

**Table S1:** Faunivory status (Fauniv= faunivorous, Non-Fauniv= non-faunivorous), dietary category (I= insectivorous, Fr= frugivorous, O= omnivorous, Gr/Fr= granivorous/ frugivorous, C= carnivorous, H= herbivorous, N= nectarivorous, AI= aquatic invertebrates) relative and dichotomous cecal size, absolute cecal length, absolute intestinal length, body mass, and flight ability status of 146 taxa of birds. These data were then mapped onto a consensus phylogenetic supertree (Davis and Page, 2014). Data primarily from DeGolier and colleagues (1999) and web databases (Axelson et al., 2017; Myers et al., 2017).

| Avian Taxon                       | Faunivory Status | Dietary Category | Relative Cecal Size (%) | Cecal Length (cm) | Intestinal length (cm) | Dichotomous Cecal Size | Body Mass (g) | Body Mass (g) | Flight Status |
|-----------------------------------|------------------|------------------|-------------------------|-------------------|------------------------|------------------------|---------------|---------------|---------------|
| <i>Tachycineta bicolor</i>        | Fa               | I                | Medium (2.5)            | 0.4               | 15.8                   | Small/Absent           | Medium (15.4) | 15.4          | Flighted      |
| <i>Progne subis</i>               | Fa               | I                | Absent (0.0)            | 0                 | 17.8                   | Small/Absent           | Medium (30.3) | 30.3          | Flighted      |
| <i>Hirundo rustica</i>            | Fa               | I                | Medium (2.1)            | 0.3               | 14.6                   | Small/Absent           | Medium (31.4) | 31.4          | Flighted      |
| <i>Piranga olivacea</i>           | Fa               | I                | Absent (0.0)            | 0                 | 20                     | Small/Absent           | Medium (34.8) | 34.8          | Flighted      |
| <i>Quiscalus quiscula</i>         | Non-Fa           | O                | Medium (1.2)            | 0.4               | 32.2                   | Small/Absent           | Medium (81.1) | 81.1          | Flighted      |
| <i>Quiscalus major</i>            | Non-Fa           | O                | Medium (1.4)            | 0.7               | 49.2                   | Small/Absent           | Large (178.2) | 178.2         | Flighted      |
| <i>Junco hyemalis</i>             | Non-Fa           | Gr/Fr            | Medium (1.2)            | 0.3               | 24.7                   | Small/Absent           | Medium (28.6) | 28.6          | Flighted      |
| <i>Parula americana</i>           | Fa               | I                | Absent (0.0)            | 0                 | 9.9                    | Small/Absent           | Small (4.3)   | 4.3           | Flighted      |
| <i>Geothlypis trichas</i>         | Fa               | I                | Absent (0.0)            | 0                 | 11                     | Small/Absent           | Small (6.3)   | 6.3           | Flighted      |
| <i>Coccothraustes vespertinus</i> | Non-Fa           | Gr/Fr            | Small (0.4)             | 0.2               | 51                     | Small/Absent           | Medium (80.0) | 80            | Flighted      |
| <i>Hylocichla mustelina</i>       | Fa               | I                | Medium (2.0)            | 0.5               | 24.6                   | Small/Absent           | Medium (51.7) | 51.7          | Flighted      |
| <i>Catharus ustulatus</i>         | Fa               | I                | Small (1.0)             | 0.2               | 20.2                   | Small/Absent           | Medium (42.1) | 42.1          | Flighted      |
| <i>Turdus migratorius</i>         | Fa               | I                | Medium (1.1)            | 0.3               | 28                     | Small/Absent           | Medium (76.6) | 76.6          | Flighted      |
| <i>Cyanocitta cristata</i>        | Non-Fa           | O                | Medium (3.0)            | 1.1               | 36.8                   | Small/Absent           | Medium (61.0) | 61            | Flighted      |
| <i>Corvus corax</i>               | Non-Fa           | O                | Medium (1.8)            | 2                 | 112.3                  | Small/Absent           | Large (874.0) | 874           | Flighted      |
| <i>Lanius ludovicianus</i>        | Fa               | I                | Medium (1.1)            | 0.3               | 28.7                   | Small/Absent           | Medium (28.7) | 28.7          | Flighted      |
| <i>Vireo flavifrons</i>           | Fa               | I                | Medium (6.7)            | 1                 | 15                     | Small/Absent           | Medium (20.0) | 20            | Flighted      |
| <i>Myiopsitta monachus</i>        | Non-Fa           | Gr/Fr            | Absent (0.0)            | 0                 | 52.6                   | Small/Absent           | Large (376.6) | 376.6         | Flighted      |
| <i>Psittacus erithacus</i>        | Non-Fa           | Gr/Fr            | Absent (0.0)            | 0                 | 114                    | Small/Absent           | Large (429.8) | 429.8         | Flighted      |
| <i>Cacatua galerita</i>           | Non-Fa           | Gr/Fr            | Absent (0.0)            | 0                 | 130.5                  | Small/Absent           | Large (589.0) | 589           | Flighted      |
| <i>Nymphicus hollandicus</i>      | Non-Fa           | Gr/Fr            | Absent (0.0)            | 0                 | 41.4                   | Small/Absent           | Medium (76.0) | 76            | Flighted      |

|                                 |        |   |              |     |      |              |                |        |                |
|---------------------------------|--------|---|--------------|-----|------|--------------|----------------|--------|----------------|
| <i>Selenidera spectabilis</i>   | Fa     | I | Absent (0.0) | 0   | 20.6 | Small/Absent | Large (149.3)  | 149.3  | Flighted       |
| <i>Colaptes auratus</i>         | Fa     | I | Absent (0.0) | 0   | 29.5 | Small/Absent | Medium (78.9)  | 78.9   | Flighted       |
| <i>Dryocopus pileatus</i>       | Fa     | I | Absent (0.0) | 0   | 51   | Small/Absent | Large (178.3)  | 178.3  | Flighted       |
| <i>Sphyrapicus varius</i>       | Fa     | I | Absent (0.0) | 0   | 28.7 | Small/Absent | Medium (38.9)  | 38.9   | Flighted       |
| <i>Megasceryle alcyon</i>       | Fa     | C | Absent (0.0) | 0   | 97.2 | Small/Absent | Large (22.1.8) | 22.1.8 | Flighted       |
| <i>Coracias abyssinica</i>      | Fa     | I | Large (15.0) | 3.7 | 24.7 | Large        | Large (119.8)  | 119.8  | Flighted       |
| <i>Trogon collaris</i>          | Fa     | I | Medium (4.4) | 3.2 | 72.7 | Small/Absent | Medium (55.5)  | 55.5   | Flighted       |
| <i>Trogon viridis</i>           | Fa     | I | Large (15.5) | 3.6 | 23.3 | Large        | Medium (90.5)  | 90.5   | Flighted       |
| <i>Trogon violaceus</i>         | Fa     | I | Medium (6.2) | 2.8 | 45   | Small/Absent | Medium (47.5)  | 47.5   | Flighted       |
| <i>Coccyzus americanus</i>      | Fa     | I | Large (12.0) | 3.7 | 30.9 | Large        | Medium (46.0)  | 46     | Flighted       |
| <i>Crotophaga ani</i>           | Fa     | I | Medium (9.8) | 2.9 | 29.7 | Large        | Medium (70.0)  | 70     | Flighted       |
| <i>Geococcyx californianus</i>  | Fa     | I | Large (14.2) | 6.5 | 45.8 | Large        | Large (171.1)  | 171.1  | Limited Flight |
| <i>Archilochus colubris</i>     | Non-Fa | N | Medium (1.8) | 0.1 | 5.6  | Small/Absent | Medium (28.6)  | 28.6   | Flighted       |
| <i>Calypte anna</i>             | Non-Fa | N | Medium (5.0) | 0.3 | 6    | Small/Absent | Small (3.0)    | 3      | Flighted       |
| <i>Caprimulgus carolinensis</i> | Fa     | I | Large (15.6) | 4.3 | 27.6 | Large        | Medium (89.1)  | 89.1   | Flighted       |
| <i>Caprimulgus vociferus</i>    | Fa     | I | Large (13.4) | 2.4 | 17.9 | Large        | Medium (34.3)  | 34.3   | Flighted       |
| <i>Pandion haliaetus</i>        | Fa     | C | Small (0.3)  | 0.5 | 204  | Small/Absent | XL (1104.5)    | 1104.5 | Flighted       |
| <i>Accipiter cooperii</i>       | Fa     | C | Small (0.2)  | 0.1 | 46.5 | Small/Absent | Large (411.6)  | 411.6  | Flighted       |
| <i>Accipiter striatus</i>       | Fa     | C | Absent (0.0) | 0   | 36   | Small/Absent | Medium (81.6)  | 81.6   | Flighted       |
| <i>Buteo platypterus</i>        | Fa     | C | Small (0.2)  | 0.1 | 60   | Small/Absent | Large (227.2)  | 227.2  | Flighted       |
| <i>Buteo lineatus</i>           | Fa     | C | Absent (0.0) | 0   | 96.9 | Small/Absent | Large (459.7)  | 459.7  | Flighted       |
| <i>Falco sparverius</i>         | Fa     | I | Small (0.1)  | 0   | 35.6 | Small/Absent | Medium (87.7)  | 87.7   | Flighted       |
| <i>Falco mexicanus</i>          | Fa     | C | Absent (0.0) | 0   | 65.5 | Small/Absent | Large (338.0)  | 338    | Flighted       |
| <i>Athene cunicularia</i>       | Fa     | C | Large (13.4) | 4.6 | 34.3 | Large        | Large (117.9)  | 117.9  | Flighted       |
| <i>Bubo virginianus</i>         | Fa     | C | Large (11.2) | 9.9 | 88.4 | Large        | XL (1057.2)    | 1057.2 | Flighted       |
| <i>Strix varia</i>              | Fa     | C | Large (11.7) | 8.9 | 76.2 | Large        | Large (651.0)  | 651    | Flighted       |
| <i>Otus asio</i>                | Fa     | C | Large (15.9) | 4.4 | 27.9 | Large        | Medium (83.2)  | 83.2   | Flighted       |
| <i>Otus kennicottii</i>         | Fa     | C | Large (15.7) | 4.1 | 26.2 | Large        | Medium (79.7)  | 79.7   | Flighted       |

|                               |    |    |                 |     |       |              |                  |        |          |
|-------------------------------|----|----|-----------------|-----|-------|--------------|------------------|--------|----------|
| <i>Tyto alba</i>              | Fa | C  | Large<br>(12.1) | 6.9 | 57    | Large        | Large<br>(419.6) | 419.6  | Flighted |
| <i>Cathartes aura</i>         | Fa | C  | Absent<br>(0.0) | 0   | 130.5 | Small/Absent | XL<br>(2097.0)   | 2097   | Flighted |
| <i>Podiceps nigricollis</i>   | Fa | AI | Medium<br>(4.8) | 6   | 125.4 | Small/Absent | Large<br>(347.4) | 347.4  | Flighted |
| <i>Tachybaptus ruficollis</i> | Fa | AI | Small<br>(0.5)  | 0.4 | 79.5  | Small/Absent | Large<br>(202.2) | 202.2  | Flighted |
| <i>Phoenicopterus minor</i>   | Fa | AI | Small<br>(1.0)  | 3.2 | 317.8 | Small/Absent | XL<br>(1158.0)   | 1158   | Flighted |
| <i>Phoenicopterus ruber</i>   | Fa | AI | Medium<br>(3.4) | 9   | 266.5 | Small/Absent | XL<br>(1878.3)   | 1878.3 | Flighted |
| <i>Egretta rufescens</i>      | Fa | C  | Small<br>(0.9)  | 1.8 | 198   | Small/Absent | Large<br>(786.0) | 786    | Flighted |
| <i>Butorides striatus</i>     | Fa | C  | Absent<br>(0.0) | 0   | 91    | Small/Absent | Large<br>(178.8) | 178.8  | Flighted |
| <i>Ardea herodias</i>         | Fa | C  | Small<br>(0.5)  | 1   | 193.1 | Small/Absent | XL<br>(1914.0)   | 1914   | Flighted |
| <i>Bubulcus ibis</i>          | Fa | C  | Small<br>(0.4)  | 0.2 | 55.2  | Small/Absent | Large<br>(220.7) | 220.7  | Flighted |
| <i>Nyctanassa violacea</i>    | Fa | AI | Small<br>(0.3)  | 0.4 | 137.1 | Small/Absent | Large<br>(511.0) | 511    | Flighted |
| <i>Nycticorax nycticorax</i>  | Fa | C  | Small<br>(0.8)  | 1   | 127.9 | Small/Absent | Large<br>(486.9) | 486.9  | Flighted |
| <i>Egretta caerulea</i>       | Fa | C  | Small<br>(0.6)  | 0.6 | 98    | Small/Absent | Large<br>(253.6) | 253.6  | Flighted |
| <i>Egretta thula</i>          | Fa | C  | Small<br>(0.7)  | 0.7 | 97.3  | Small/Absent | Large<br>(289.3) | 289.3  | Flighted |
| <i>Botaurus lentiginosus</i>  | Fa | C  | Small<br>(0.6)  | 0.7 | 113.9 | Small/Absent | Large<br>(248.0) | 248    | Flighted |
| <i>Ixobrychus exilis</i>      | Fa | C  | Absent<br>(0.0) | 0   | 68.5  | Small/Absent | Medium<br>(61.5) | 61.5   | Flighted |
| <i>Pelecanus occidentalis</i> | Fa | C  | Medium<br>(2.0) | 4.7 | 239.6 | Small/Absent | XL<br>(1947.7)   | 1947.7 | Flighted |
| <i>Eudocimus ruber</i>        | Fa | AI | Small<br>(0.5)  | 0.5 | 103   | Small/Absent | Large<br>(611.9) | 611.9  | Flighted |
| <i>Ajaia ajaja</i>            | Fa | C  | Small<br>(0.5)  | 0.8 | 161.6 | Small/Absent | XL<br>(1543.0)   | 1543   | Flighted |
| <i>Mycteria americana</i>     | Fa | C  | Small<br>(0.2)  | 0.6 | 295.5 | Small/Absent | XL<br>(1800.0)   | 1800   | Flighted |
| <i>Anhinga anhinga</i>        | Fa | C  | Small<br>(0.1)  | 0.1 | 115.8 | Small/Absent | Large<br>(605.6) | 605.6  | Flighted |
| <i>Phalacrocorax auritus</i>  | Fa | C  | Small<br>(0.9)  | 1.1 | 127.7 | Small/Absent | Large<br>(803.3) | 803.3  | Flighted |
| <i>Morus bassanus</i>         | Fa | C  | Small<br>(0.9)  | 1.1 | 122.8 | Small/Absent | XL<br>(1731.3)   | 1731.3 | Flighted |
| <i>Calonectris diomedea</i>   | Fa | C  | Medium<br>(1.9) | 1   | 53.1  | Small/Absent | Large<br>(404.9) | 404.9  | Flighted |
| <i>Puffinus lherminieri</i>   | Fa | C  | Small<br>(0.8)  | 0.3 | 40.2  | Small/Absent | Large<br>(107.0) | 107    | Flighted |
| <i>Puffinus gravis</i>        | Fa | C  | Small<br>(0.8)  | 0.6 | 72.4  | Small/Absent | Large<br>(380.0) | 380    | Flighted |
| <i>Pterodroma hasitata</i>    | Fa | C  | Small<br>(0.7)  | 0.5 | 69    | Small/Absent | Large<br>(446.0) | 446    | Flighted |
| <i>Oceanites oceanicus</i>    | Fa | C  | Small<br>(0.9)  | 0.4 | 42.8  | Small/Absent | Large<br>(144.8) | 144.8  | Flighted |

|                                |        |    |              |      |       |              |               |        |                |
|--------------------------------|--------|----|--------------|------|-------|--------------|---------------|--------|----------------|
| <i>Phoebastria immutabilis</i> | Fa     | C  | Small (0.8)  | 1.5  | 180   | Small/Absent | XL (2460.0)   | 2460   | Flighted       |
| <i>Gavia immer</i>             | Fa     | C  | Medium (3.4) | 5.3  | 157   | Small/Absent | XL (1797.6)   | 1797.6 | Flighted       |
| <i>Porzana carolina</i>        | Non-Fa | H  | Medium (8.9) | 3.4  | 38.2  | Large        | Medium (51.2) | 51.2   | Flighted       |
| <i>Fulica americana</i>        | Non-Fa | O  | Large (16.5) | 15.3 | 92.8  | Large        | Large (383.8) | 383.8  | Limited Flight |
| <i>Gallinula chloropus</i>     | Non-Fa | H  | Medium (8.7) | 11   | 126.7 | Large        | Large (225.3) | 225.3  | Flighted       |
| <i>Laterallus jamaicensis</i>  | Fa     | I  | Medium (6.1) | 1.2  | 19.7  | Small/Absent | Medium (18.5) | 18.5   | Limited Flight |
| <i>Rallus limicola</i>         | Fa     | AI | Large (12.2) | 5    | 40.9  | Large        | Large (129.7) | 129.7  | Limited Flight |
| <i>Porphyrio martinica</i>     | Non-Fa | O  | Medium (7.3) | 3.5  | 47.7  | Large        | Large (163.9) | 163.9  | Limited Flight |
| <i>Aramus guarauna</i>         | Fa     | AI | Medium (8.3) | 5.9  | 71    | Large        | Large (591.6) | 591.6  | Flighted       |
| <i>Phalaropus tricolor</i>     | Fa     | AI | Large (11.5) | 3.9  | 34    | Large        | Medium (61.2) | 61.2   | Flighted       |
| <i>Calidris canutus</i>        | Fa     | I  | Large (10.1) | 4.1  | 40.6  | Large        | Large (102.6) | 102.6  | Flighted       |
| <i>Calidris melanotos</i>      | Fa     | I  | Medium (7.5) | 1.9  | 25.5  | Large        | Medium (27.6) | 27.6   | Flighted       |
| <i>Calidris alba</i>           | Fa     | I  | Large (10.7) | 3    | 28.1  | Large        | Medium (51.5) | 51.5   | Flighted       |
| <i>Calidris pusilla</i>        | Fa     | I  | Medium (9.5) | 2.5  | 26.3  | Large        | Medium (22.5) | 22.5   | Flighted       |
| <i>Arenaria interpres</i>      | Fa     | I  | Medium (9.7) | 4.1  | 42.5  | Large        | Medium (79.4) | 79.4   | Flighted       |
| <i>Gallinago undulata</i>      | Fa     | I  | Medium (8.5) | 2.7  | 31.9  | Large        | Medium (69.3) | 69.3   | Flighted       |
| <i>Fratercula cirrhata</i>     | Fa     | C  | Small (0.7)  | 0.6  | 84.5  | Large        | Large (913.5) | 913.5  | Flighted       |
| <i>Sterna maxima</i>           | Fa     | C  | Medium (1.4) | 0.9  | 65.8  | Large        | Large (260.5) | 260.5  | Flighted       |
| <i>Sterna hirundo</i>          | Fa     | C  | Medium (1.7) | 0.6  | 36.4  | Small/Absent | Medium (76.3) | 76.3   | Flighted       |
| <i>Sterna caspia</i>           | Fa     | C  | Small (1.0)  | 0.8  | 83.7  | Large        | Large (423.2) | 423.2  | Flighted       |
| <i>Sterna fuscata</i>          | Fa     | C  | Small (0.4)  | 0.2  | 46.9  | Large        | Large (195.0) | 195    | Flighted       |
| <i>Sterna antillarum</i>       | Fa     | C  | Small (0.9)  | 0.2  | 23    | Small/Absent | Medium (24.8) | 24.8   | Flighted       |
| <i>Larus atricilla</i>         | Fa     | C  | Small (0.9)  | 0.5  | 54.6  | Large        | Large (267.5) | 267.5  | Flighted       |
| <i>Larus argentatus</i>        | Non-Fa | O  | Medium (1.1) | 1.1  | 96.5  | Large        | Large (787.9) | 787.9  | Flighted       |
| <i>Larus hyperboreus</i>       | Non-Fa | O  | Small (0.8)  | 1    | 123.5 | Small/Absent | XL (1132.0)   | 1132   | Flighted       |
| <i>Larus californicus</i>      | Fa     | I  | Small (0.5)  | 0.5  | 106.4 | Large        | Large (470.0) | 470    | Flighted       |
| <i>Larus delawarensis</i>      | Non-Fa | O  | Medium (1.2) | 0.9  | 74.1  | Large        | Large (359.7) | 359.7  | Flighted       |
| <i>Rynchops niger</i>          | Fa     | C  | Medium (2.0) | 0.9  | 44.7  | Large        | Large (288.2) | 288.2  | Flighted       |

|                                  |        |       |              |      |       |              |               |       |                |
|----------------------------------|--------|-------|--------------|------|-------|--------------|---------------|-------|----------------|
| <i>Charadrius vociferus</i>      | Fa     | I     | Large (11.4) | 2.8  | 24.6  | Large        | Medium (25.6) | 25.6  | Flighted       |
| <i>Recurvirostra americana</i>   | Non-Fa | O     | Medium (9.0) | 6.7  | 74.3  | Large        | Large (320.5) | 320.5 | Flighted       |
| <i>Haematopus palliatus</i>      | Fa     | AI    | Medium (5.3) | 4.9  | 93.2  | Large        | Large (461.0) | 461   | Flighted       |
| <i>Pluvialis dominica</i>        | Fa     | I     | Medium (2.8) | 2.3  | 81.3  | Large        | Large (158.6) | 158.6 | Flighted       |
| <i>Columba livia</i>             | Non-Fa | Gr/Fr | Small (0.6)  | 0.5  | 84.3  | Large        | Large (286.0) | 286   | Flighted       |
| <i>Streptopelia capicola</i>     | Non-Fa | Gr/Fr | Small (0.4)  | 0.2  | 52    | Large        | Large (119.4) | 119.4 | Flighted       |
| <i>Zenaida asiatica</i>          | Non-Fa | Gr/Fr | Absent (0.0) | 0    | 56    | Large        | Large (140.1) | 140.1 | Flighted       |
| <i>Zenaida macroura</i>          | Non-Fa | Gr/Fr | Absent (0.0) | 0    | 49.5  | Small/Absent | Large (100.7) | 100.7 | Flighted       |
| <i>Columbina passerina</i>       | Non-Fa | Gr/Fr | Absent (0.0) | 0    | 31.3  | Small/Absent | Medium (32.3) | 32.3  | Flighted       |
| <i>Opisthocomus hoazin</i>       | Non-Fa | H     | Medium (4.9) | 4    | 82.2  | Large        | Large (750.0) | 750   | Limited Flight |
| <i>Numida meleagris</i>          | Non-Fa | H     | Large (15.0) | 39.4 | 262.7 | Large        | XL (1351.0)   | 1351  | Flighted       |
| <i>Gallus gallus</i>             | Non-Fa | Gr/Fr | Medium (9.6) | 18.3 | 191.5 | Large        | XL (2045.0)   | 2045  | Flighted       |
| <i>Bonasa umbellus</i>           | Non-Fa | O     | Large (40.1) | 41.8 | 104.3 | Large        | Large (397.9) | 397.9 | Flighted       |
| <i>Canachites canadensis</i>     | Non-Fa | H     | Large (34.5) | 40   | 116   | Large        | Large (576.0) | 576   | Limited Flight |
| <i>Tetrao urogallus</i>          | Non-Fa | Gr/Fr | Large (29.4) | 52   | 177   | Large        | XL (2500.0)   | 2500  | Limited Flight |
| <i>Centrocercus urophasianus</i> | Non-Fa | Gr/Fr | Large (49.2) | 73   | 148   | Large        | XL (1427.0)   | 1427  | Flighted       |
| <i>Dendragapus obscurus</i>      | Non-Fa | Gr/Fr | Large (36.2) | 50   | 138   | Large        | XL (1250.0)   | 1250  | Limited Flight |
| <i>Tympanuchus phasianellus</i>  | Non-Fa | H     | Large (36.2) | 49   | 135.5 | Large        | Large (850.0) | 850   | Flighted       |
| <i>Tympanuchus cupido</i>        | Non-Fa | Gr/Fr | Large (34.4) | 45   | 131   | Large        | XL (1120.0)   | 1120  | Flighted       |
| <i>Lagopus lagopus</i>           | Non-Fa | H     | Large (45.4) | 47   | 103.5 | Large        | Large (525.0) | 525   | Limited Flight |
| <i>Lagopus mutus</i>             | Non-Fa | H     | Large (40.9) | 47   | 115   | Large        | Large (502.0) | 502   | Flighted       |
| <i>Meleagris gallopavo</i>       | Non-Fa | O     | Large (20.0) | 46.5 | 232.8 | Large        | XL (6775.0)   | 6775  | Flighted       |
| <i>Chrysolophus pictus</i>       | Non-Fa | Gr/Fr | Large (13.2) | 9.6  | 72.7  | Large        | Large (366.7) | 366.7 | Limited Flight |
| <i>Perdix perdix</i>             | Non-Fa | Gr/Fr | Large (28.2) | 19   | 67.3  | Large        | Large (395.0) | 395   | Limited Flight |
| <i>Alectoris graeca</i>          | Non-Fa | Gr/Fr | Large (22.1) | 19   | 86    | Large        | Large (576.0) | 576   | Limited Flight |
| <i>Coturnix japonica</i>         | Non-Fa | Gr/Fr | Large (16.6) | 26.3 | 158.4 | Large        | Medium (90.0) | 90    | Flighted       |
| <i>Oreortyx pictus</i>           | Non-Fa | Gr/Fr | Large (19.9) | 17.5 | 88    | Large        | Large (250.0) | 250   | Limited Flight |

|                                 |        |       |              |      |       |       |               |        |                |
|---------------------------------|--------|-------|--------------|------|-------|-------|---------------|--------|----------------|
| <i>Callipepla squamata</i>      | Non-Fa | Gr/Fr | Large (15.3) | 10.5 | 68.5  | Large | Large (175.0) | 175    | Flighted       |
| <i>Callipepla californica</i>   | Non-Fa | Gr/Fr | Large (16.2) | 13.9 | 86    | Large | Large (173.0) | 173    | Flighted       |
| <i>Callipepla gambelii</i>      | Non-Fa | Gr/Fr | Large (12.6) | 11.3 | 89    | Large | Large (188.0) | 188    | Flighted       |
| <i>Colinus virginianus</i>      | Non-Fa | O     | Large (15.1) | 11.3 | 74.7  | Large | Large (161.1) | 161.1  | Flighted       |
| <i>Cyrtonyx montezumae</i>      | Non-Fa | O     | Large (21.5) | 11.5 | 53.5  | Large | Large (186.0) | 186    | Flighted       |
| <i>Cairina moschata</i>         | Non-Fa | O     | Medium (9.3) | 12.8 | 137.9 | Large | Large (585.0) | 585    | Flighted       |
| <i>Aix sponsa</i>               | Fa     | C     | Medium (8.1) | 8.9  | 109.5 | Large | Large (537.3) | 537.3  | Flighted       |
| <i>Anas fulvigula</i>           | Fa     | C     | Medium (8.9) | 12.6 | 142   | Large | Large (543.9) | 543.9  | Flighted       |
| <i>Anas platyrhynchos</i>       | Non-Fa | Gr/Fr | Large (11.5) | 16.1 | 169.5 | Large | Large (929.5) | 929.5  | Flighted       |
| <i>Anas americana</i>           | Non-Fa | H     | Large (15.6) | 22.5 | 144.4 | Large | Large (530.0) | 530    | Flighted       |
| <i>Anas discors</i>             | Non-Fa | Gr/Fr | Medium (6.2) | 6.6  | 106.1 | Large | Large (250.3) | 250.3  | Flighted       |
| <i>Aythya collaris</i>          | Non-Fa | H     | Large (10.5) | 13.3 | 126.9 | Large | Large (612.1) | 612.1  | Flighted       |
| <i>Mergus serrator</i>          | Fa     | C     | Medium (1.9) | 2.8  | 144.6 | Large | Large (461.4) | 461.4  | Flighted       |
| <i>Anser cygnoides</i>          | Non-Fa | H     | Large (11.9) | 90.2 | 758.0 | Large | XL (3150.0)   | 3150   | Flighted       |
| <i>Struthio camelus</i>         | Non-Fa | H     | Medium (6.5) | 94   | 1440  | Large | XL (122000)   | 122000 | Flightless     |
| <i>Dromaius novaehollandiae</i> | Non-Fa | O     | Medium (2.7) | 8.6  | 312   | Large | XL (38300)    | 38300  | Flightless     |
| <i>Apteryx mantelli</i>         | Fa     | I     | Large (12.2) | 16.5 | 135.1 | Large | XL (2012)     | 2012   | Flightless     |
| <i>Rhea americana</i>           | Non-Fa | H     | Large (26.7) | 48   | 180   | Large | XL (8500)     | 8500   | Flightless     |
| <i>Crypturellus tataupa</i>     | Non-Fa | Gr/Fr | Medium (3.0) | 1.25 | 42.3  | Large | Large (220)   | 220    | Limited Flight |
| <i>Nothoprocta cinerascens</i>  | Fa     | I     | Medium (4.7) | 2.4  | 51.3  | Large | Large (526)   | 526    | Limited Flight |
| <i>Nothoprocta ornata</i>       | Non-Fa | Gr/Fr | Medium (2.3) | 18.7 | 82.4  | Large | Large (514)   | 514    | Limited Flight |
| <i>Nothura darwini</i>          | Non-Fa | Gr/Fr | Medium (2.3) | 14.1 | 60.8  | Large | Large (234)   | 234    | Limited Flight |
| <i>Nothura maculosa</i>         | Non-Fa | Gr/Fr | Medium (6.5) | 3.1  | 48    | Large | Large (247)   | 247    | Limited Flight |
